# Supplementary material
Source: PubMed Central journal article supplement (PMC2268156)

**SNU-398**

**SNU-182**

**SNU-475**

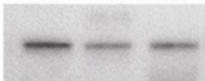

**Stat3**

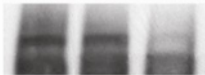

**pStat3**

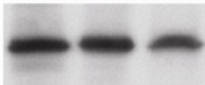

**Actin**

Supplement: supp_0705395105_05395Fig12.pdf [file supp_0705395105_05395Fig12.pdf]

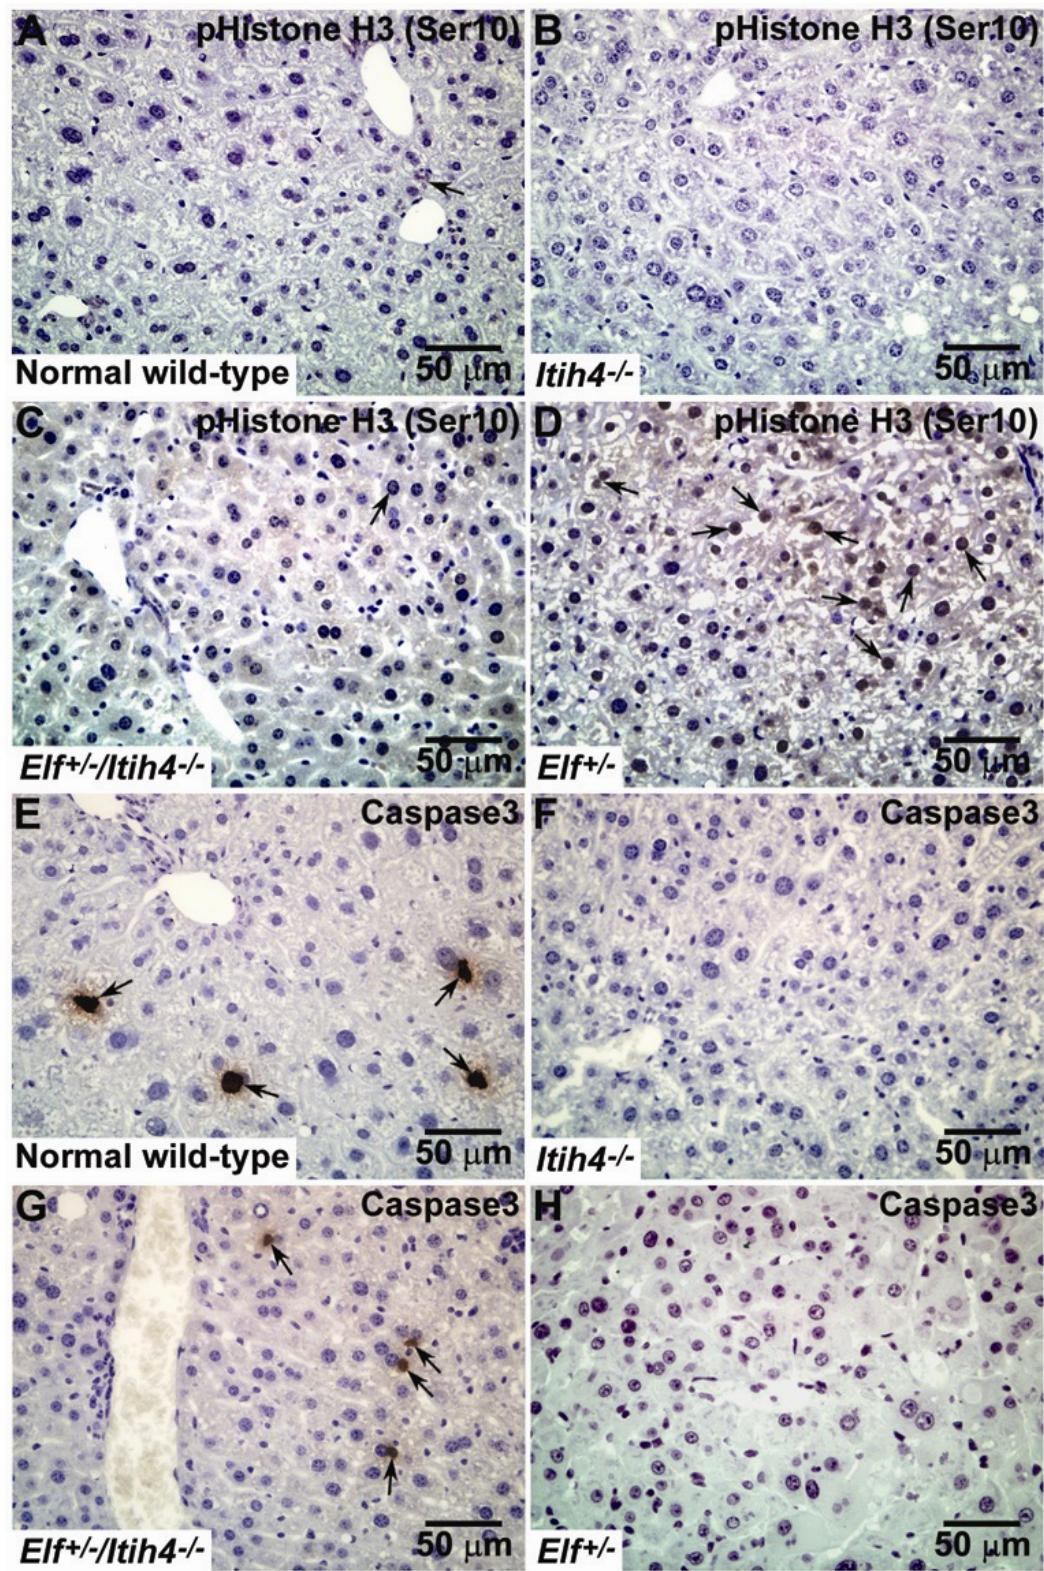

Supplement: supp_0705395105_05395Fig13.pdf [file supp_0705395105_05395Fig13.pdf]

**A**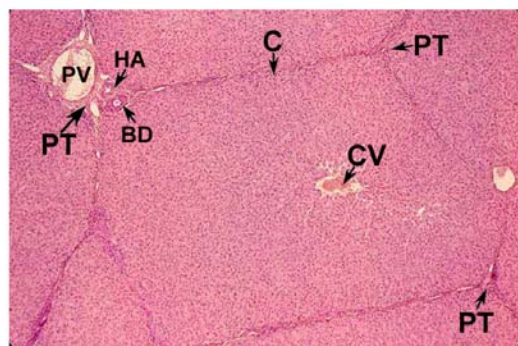**B**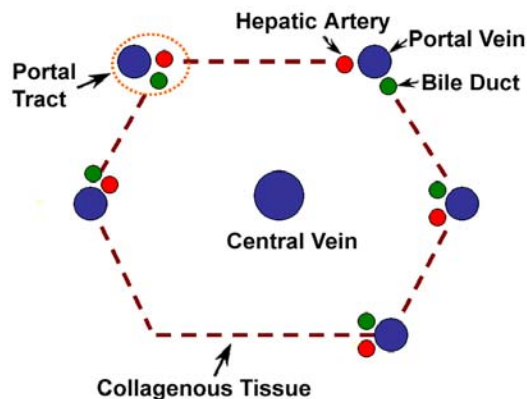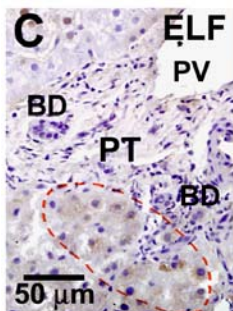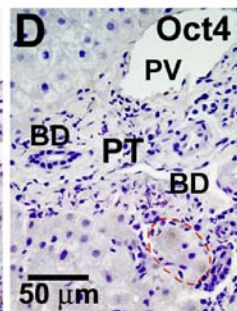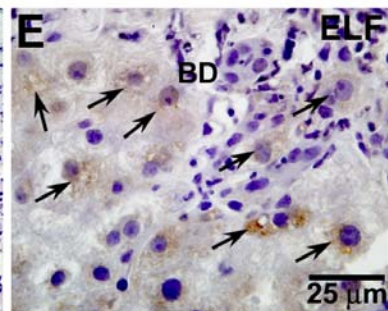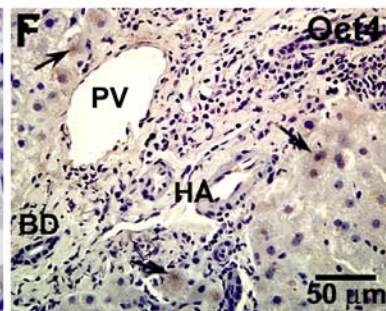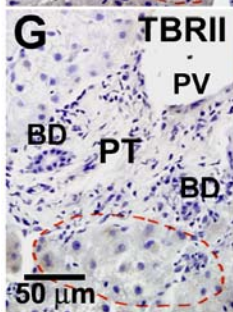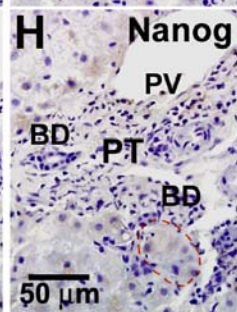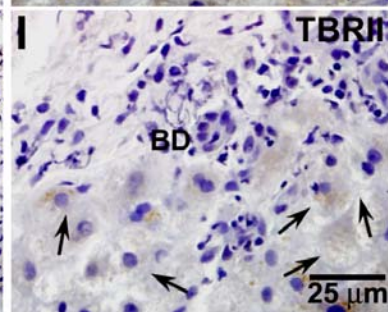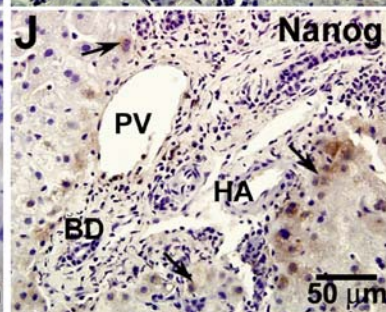

Supplement: supp_0705395105_05395Fig5.pdf [file supp_0705395105_05395Fig5.pdf]

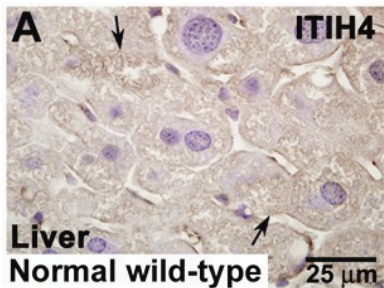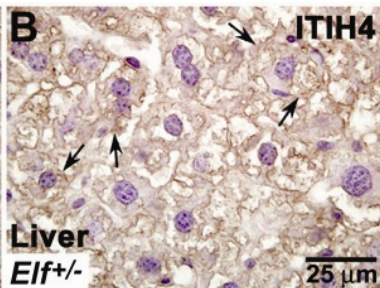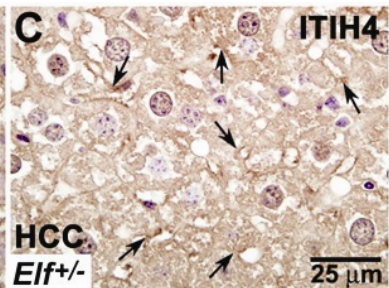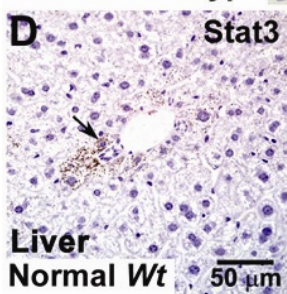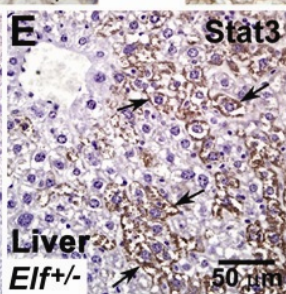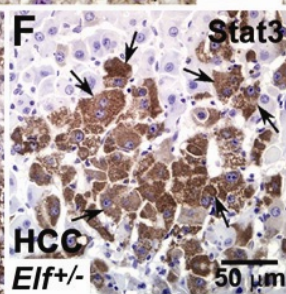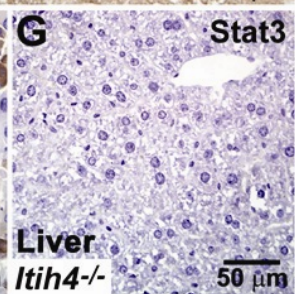

Supplement: supp_0705395105_05395Fig9.pdf [file supp_0705395105_05395Fig9.pdf]
